# Supplementary material for: HFpEF as the Predominant and Underrecognized Heart Failure Phenotype in Type 2 Diabetes: Evidence from the DIABET-IC Study
Source: Research Square preprint supplement (doi:10.21203/rs.3.rs-7506485/v1), 2025-09-11
Supplement: Supplementary file 1 [file 298d83640adc64e0c3b7a94e.docx]

| Supplementary table S3. CKD Stages and KDIGO Risk by HF Phenotype | | | | | | | |
| --- | --- | --- | --- | --- | --- | --- | --- |
| CKD/Risk category | No HF  (1) (n=759) | Total HF (n=490) | HFrEF  (2) (n=246) | HFpEF (3)  (n=150) | p  1 vs 2 | p  1 vs 3 | p  2 vs 3 |
| CKD  Stage 3 (%) | 49.2 | 65.2 | 66.25 | 63.33 | < 0.001 | < 0.001 | NS |
| CKD  Stages 4–5 (%) | 3.2² | 11.9 | 12.50 | 10.84 | < 0.001 | < 0.001 | NS |
| KDIGO  low risk (%) | 63.96 | 43.4 | 42.51 | 44.86 | < 0.001 | < 0.001 | NS |
| KDIGO  very-high-risk (%) | 4.05 | 14.3 | 14.97 | 13.17 | < 0.001 | < 0.001 | NS |

Categorical variables are presented as n (%). (p <0.05). NS: non statistical significance. List of Abbreviations: KDIGO: Kidney Disease Improving Global Outcome.
