# Supplementary material for: HFpEF as the Predominant and Underrecognized Heart Failure Phenotype in Type 2 Diabetes: Evidence from the DIABET-IC Study
Source: Research Square preprint supplement (doi:10.21203/rs.3.rs-7506485/v1), 2025-09-11
Supplement: Supplementary file 2 [file b32dc9325cb8ce6a9f12aa4e.docx]

| Supplementary Table S5. Summary of phenotype differences in T2D with HF | | |
| --- | --- | --- |
| Domain | HFpEF  (LVEF ≥50%) | HFrEF%  (LVEF <40%) |
| Prevalence at baseline | 150 / 1,249 (12%)  30.6% of HF | 246 / 1,249 (19.7%)  50.2% of HF |
| Prevalence at end of follow-up (N=1,249) | 177 / 1,249 (14.2%) 32.3% of HF (n=548) | 260 / 1,249 (20.8%) 47.4% of HF (n=548) |
| Incidence over 3 years (among no HF at baseline, n=759) | 27 / 759 (3.6%) 46.6% of incident HF (n=58) | 14 / 759 (1.8%) 24.1% of incident HF (n=58) |
| Newly diagnosed HF at baseline via screening | 11 (50%) | 5 (22.7%) |
| Demographics & clinical profile | Older; female predominance; higher prevalence of hypertension & metabolic syndrome; higher BMI and SBP  (cardiometabolic phenotype). Longer diabetes duration | lower BP and younger age at the time of diabetes diagnosis |
| Ischemic heart disease |  | Greater ischemic burden: more CAD, multivessel disease, prior STEMI, and revascularization |
| Cardiovascular history | Lower rates of: previous cardiopathy (92.0%), CVD due to atherosclerosis (52.73%), CAD (45.09%), multivessel disease (>1 territory) (14.18%), VF (14.49%). Higher rates of: coronary stents (73.6%), aortic valvulopathy (20.55%), LV hypertrophy due to HTA (27.67%). | Higher rates of: previous cardiopathy (99.53%), CVD due to atherosclerosis (67.91%), CAD (61.86%), multivessel disease (>1 territory) (18.60%), VF (44.44%).  Lower rates of: coronary stents (60.61%), aortic valvulopathy (9.35%), LV hypertrophy due to HTA (10.75%). |
| Arrhythmic profile | AF  slightly more prevalent | Ventricular arrhythmias and device therapy (pacemaker/ICD) more common |
| Biomarkers | NT-proBNP elevated vs non-HF but lower than HF < 40%, tended to increase over follow-up | NT-proBNP consistently higher; tended to decrease over follow-up |
| LVEF trajectory & phenotype transitions | LVEF stable in most; 7 patients (4.7%) progressed to HFrEF over 3 years | LVEF tended to improve |
| Renal comorbidity | High CKD burden | High CKD burden; advanced stages slightly more frequent |
| Outcomes  (follow-up) | ACS numerically higher | Hospitalizations tended to be higher |
| Implications | Need for non–weight-dependent biomarkers and structured phenotyping | Classic ischemic/HF pathways supported by higher NP levels |

List of Abbreviations: AF, atrial fibrillation; ACS, acute coronary syndrome; BMI, body mass index; BP, blood pressure; CAD, coronary artery disease; CKD, chronic kidney disease; EAT, epicardial adipose tissue; HFrEF, heart failure with reduced EF (<40%); ICD, implantable cardioverter-defibrillator; LVEF, left ventricular ejection fraction; NP, natriuretic peptide; NT-proBNP, N-terminal pro-B-type natriuretic peptide; PY, person-years; SBP, systolic blood pressure; STEMI, ST-elevation myocardial infarction; VA, ventricular arrhythmias.
