# Supplementary material for: HFpEF as the Predominant and Underrecognized Heart Failure Phenotype in Type 2 Diabetes: Evidence from the DIABET-IC Study
Source: Research Square preprint supplement (doi:10.21203/rs.3.rs-7506485/v1), 2025-09-11
Supplement: Supplementary file 3 [file b3e5b98d05c895c111250a43.docx]

| Supplementary Table S1. Baseline characteristics of T2D patients by heart failure status (No HF vs. HF) | | | |
| --- | --- | --- | --- |
| Variable | No HF (n = 759) | HF (n = 490) | p-value |
| Demographics |  |  |  |
| Age (years) | 66.0 ± 9.8 | 69.4 ± 9.8 | < 0.001 |
| Female (%) | 32.9 | 29.8 | NS |
| Employment status, n (%) |  |  | < 0.001 |
| Employed | 207 (27.3) | 51 (10.4) |  |
| Unemployed | 37 (4.9) | 13 (2.6) |  |
| Retired | 419 (55.3) | 337 (68.8) |  |
| Disabled | 16 (2.1) | 45 (9.2) |  |
| Housewife | 79 (10.4) | 44 (8.9) |  |
| Family status, n (%) |  |  | 0.027 |
| Lives with partner | 566 (74.9) | 334 (68.2) |  |
| Lives with relatives | 100 (13.2) | 95 (19.4) |  |
| Lives alone | 86 (11.4) | 58 (11.8) |  |
| Institutionalized | 4 (0.5) | 3 (0.6) |  |
| Education level, n (%) |  |  | < 0.001 |
| Illiterate | 15 (1.9) | 20 (4.1) |  |
| Primary education | 409 (54.1) | 312 (63.7) |  |
| Secondary education | 183 (24.2) | 105 (21.4) |  |
| Vocational training | 76 (10.1) | 23 (4.7) |  |
| University education | 73 (9.7) | 30 (6.1) |  |
| Vital signs & anthropometry |  |  |  |
| SBP, mmHg | 137.8 ± 18.4 | 129.8 ± 19.9 | < 0.001 |
| DBP, mmHg | 76.9 ± 11.1 | 73.1 ± 11.4 | < 0.001 |
| BMI, kg/m² | 30.2 ± 5.5 | 30.2 ± 5.6 | NS |
| Obesity, n (%) | 368 (48.7) | 227 (47.1) | NS |
| Cardiometabolic comorbidities |  |  |  |
| Hypertension, n (%) | 606 (79.8) | 409 (83.5) | NS |
| Dyslipidemia, n (%) | 622 (81.9) | 393 (80.2) | NS |
| Smoking history, n (%) |  |  | 0.032 |
| Never | 355 (46.8) | 205 (41.8) |  |
| Former (< 1 year) | 84 (11.1) | 43 (8.8) |  |
| Former (≥ 1 year) | 21 (2.3) | 24 (4.9) |  |
| Current | 299 (39.4) | 218 (44.5) |  |
| COPD, n (%) | 63 (8.3) | 70 (14.3) | < 0.001 |
| Chronic kidney disease, n (%) | 126 (16.6) | 167 (34.1) | < 0.001 |
| Cancer, n (%) | 51 (6.7) | 44 (8.9) | NS |
| CAD, n (%) | 280 (37.0) | 257 (52.5) | < 0.001 |
| Cerebrovascular disease, n (%) | 52 (6.9) | 50 (10.2) | 0.036 |
| PAD, n (%) | 61 (8.1) | 74 (15.1) | < 0.001 |
| Atrial fibrillation, n (%) | 89 (11.8) | 187 (38.2) | < 0.001 |
| Laboratory & ECG |  |  |  |
| Hemoglobin, g/dL | 14.3 ± 1.7 | 13.7 ± 1.9 | < 0.001 |
| eGFR, mL/min/1.73 m² | 78.7 ± 20.9 | 65.3 ± 23.4 | < 0.001 |
| Albuminuria, mg/g | 11.8 (3.3–32.3) | 10.0 (3.0–34.0) | NS |
| Total cholesterol, mg/dL | 156.2 ± 35.6 | 148.3 ± 36.5 | 0.001 |
| LDL-C, mg/dL | 81.5 ± 29.6 | 77.5 ± 30.3 | 0.023 |
| HDL-C, mg/dL | 45.5 ± 12.5 | 41.8 ± 11.8 | < 0.001 |
| Triglycerides, mg/dL | 149.9 ± 83.2 | 155.9 ± 89.1 | NS |
| TG/HDL-C ratio | 3.7 ± 2.9 | 4.2 ± 3.4 | < 0.001 |
| HbA1c, % | 7.2 (6.5–7.9) | 7.0 (6.3–7.8) | NS |
| NT-proBNP, pg/mL | 132 (60–306) | 784 (289–2090) | < 0.001 |
| ECG rhythm, n (%) |  |  | < 0.001 |
| Sinus rhythm | 686 (90.4) | 313 (63.9) |  |
| Atrial fibrillation | 58 (7.6) | 124 (25.3) |  |
| Pacemaker | 11 (1.4) | 43 (8.7) |  |
| Other | 4 (0.5) | 10 (2.0) |  |
| Conduction abnormalities, n (%) |  |  | < 0.001 |
| None | 653 (86.0) | 371 (75.7) |  |
| 1st-degree AV block | 23 (3.0) | 13 (2.7) |  |
| RBBB | 58 (7.6) | 24 (4.9) |  |
| LBBB | 25 (3.3) | 82 (16.7) |  |
| LV hypertrophy (ECG), n (%) | 290 (38.2) | 184 (37.5) | NS |

Categorical variables are presented as n (%); continuous variables as mean ± SD or median (IQR). (p <0.05). NS: non-statistical significance. List of Abbreviations: HF, heart failure; SBP, systolic blood pressure; DBP, diastolic blood pressure; BMI, body mass index; COPD, chronic obstructive pulmonary disease; eGFR, estimated glomerular filtration rate; LDL-C, low-density lipoprotein cholesterol; HDL-C, high-density lipoprotein cholesterol; TG, triglycerides; HbA1c, glycated hemoglobin; NT-proBNP, N-terminal pro-B-type natriuretic peptide; CAD, coronary artery disease; PAD, peripheral artery disease; OSA, obstructive sleep apnea; AV, atrioventricular; RBBB, right bundle branch block; LBBB, left bundle branch block.
