# Supplementary material for: HFpEF as the Predominant and Underrecognized Heart Failure Phenotype in Type 2 Diabetes: Evidence from the DIABET-IC Study
Source: Research Square preprint supplement (doi:10.21203/rs.3.rs-7506485/v1), 2025-09-11
Supplement: Supplementary file 4 [file f53dec4b1aed12e3a1c92f92.docx]

| Supplementary Table S2. Social situations | | | | | | |
| --- | --- | --- | --- | --- | --- | --- |
|  | No HF (1) | HFrEF (2) | HFpEF (3) | p (1 vs 2) | p (1 vs 3) | p (2 vs 3) |
| Employment status | | | | <0.001 | <0.001 | <0.045 |
| Employments (%) | 27.31 | 10.7 | 10.18 |  |  |  |
| Unemployed (%) | 4.88 | 2.79 | 2.55 |  |  |  |
| Retired (%) | 55.28 | 68.37 | 69.09 |  |  |  |
| Disability (%) | 2.11 | 12.56 | 6.55 |  |  |  |
| Stay-home parent | 10.42 | 5.58 | 11.64 |  |  |  |
|  |  |  |  |  |  |  |
| Living situation | | | | NS | <0.001 | 0.005 |
| Co-habiting with partner (%) | 74.87 | 74.42 | 63.27 |  |  |  |
| Living with relatives (%) | 13.23 | 13.95 | 23.64 |  |  |  |
| Living alone (%) | 11.38 | 10.23 | 13.09 |  |  |  |
| Institutionalized (%) | 0.53 | 1.4 | 0 |  |  |  |
|  |  |  |  |  |  |  |
| Educational level | | | | 0.012 | <0.001 | 0.07 |
| Unlettered (%) | 1.98 | 1.4 | 6.18 |  |  |  |
| Elementary school (%) | 54.1 | 66.05 | 61.82 |  |  |  |
| High school (%) | 24.21 | 20.93 | 21.82 |  |  |  |
| FP= (%) | 10.05 | 4.19 | 5.09 |  |  |  |
| College graduate (%) | 9.66 | 7.44 | 5.09 |  |  |  |
|  |  |  |  |  |  |  |

Lis of Abbreviations: HF, heart failure; HFrEF, heart failure with reduced ejection fraction; HFpEF, heart failure with preserved ejection fraction; FP, vocational training (Formación Profesional); NS, non-significant.
