# Supplementary material for: HFpEF as the Predominant and Underrecognized Heart Failure Phenotype in Type 2 Diabetes: Evidence from the DIABET-IC Study
Source: Research Square preprint supplement (doi:10.21203/rs.3.rs-7506485/v1), 2025-09-11
Supplement: Supplementary file 5 [file ff9decd541cec33bdcb153a4.docx]

**Supplementary Figures S4a–S4b**. Percentages of antihyperlipidemic therapy at baseline. (p <0.05) * Statistically differences between no HF and HFrEF. Figure 1b. Percentages of antihyperlipidemic therapy at baseline. (p <0.05) ** Statistically differences between no HF and HFrEF.
